# Supplementary material for: Crystal structure of phloridzin and its distribution changes in flowering and fruiting stage of Malus rockii
Source: publisher site journal article supplement (doi:10.1515/znc-2023-0046), 2023-08-23
Supplement: Supplementary file 1 [file j_znc-2023-0046_suppl_001.docx]

**Supplementary Material**

**Crystal structure of** **phloridzin and its** **distribution** **changes in flowering and fruiting stage of *Malus rockii***

Hui-Rong Bai, Jing Li, Li-Juan Lang, Yi Hao, Bei Jiang* and Chao-Jiang Xiao*

*Corresponding authors:

E-mail: xiaochaojiang@yeah.net (C.-J. Xiao).

E-mail: jiangbei@dali.edu.cn (B. Jiang).

H.-R. Bai and J. Li contributed equally to this work.

**CONTENTS**

[**Figure S1** View of the pack drawing of phloridzin 1](#_Toc121390827)

[**Table S1** Crystal data and structure refinement for phloridzin. 2](#_Toc121390828)

[**Figure S2** 1H NMR spectrum for phloretin (400 MHz, CD3COCD3). 3](#_Toc121390829)

[**Figure S3** 13C NMR and DEPT spectra for phloretin(100 MHz, CD3COCD3). 4](#_Toc121390830)

**Figure S1** View of the pack drawing of phloridzin. Hydrogen-bonds are shown as dashed lines.

**Table S1** Crystal data and structure refinement for phloridzin.

Identification code global

Empirical formula C21 H28 O12

Formula weight 472.43

Temperature 100(2) K

Wavelength 1.54178 Å

Crystal system Orthorhombic

Space group P2**1**2**1**2**1**

Unit cell dimensions a = 4.9031(2) Å α = 90°.

b = 18.7417(7) Å β = 90°.

c = 22.9358(9) Å γ = 90°.

Volume 2107.63(14) Å3

Z 4

Density (calculated) 1.489 Mg/m3

Absorption coefficient 1.054 mm-1

F(000) 1000

Crystal size 0.520 x 0.480 x 0.150 mm3

Theta range for data collection 3.04 to 70.24°.

Index ranges -5<=h<=4, -22<=k<=22, -27<=l<=27

Reflections collected 16900

Independent reflections 3976 [R(int) = 0.0348]

Completeness to theta = 70.24° 99.8 %

Absorption correction Semi-empirical from equivalents

Max. and min. transmission 0.86 and 0.62

Refinement method Full-matrix least-squares on F2

Data / restraints / parameters 3976 / 0 / 305

Goodness-of-fit on F2 1.069

Final R indices [I>2sigma(I)] R1 = 0.0263, wR2 = 0.0677

R indices (all data) R1 = 0.0268, wR2 = 0.0682

Absolute structure parameter 0.02(5)

Largest diff. peak and hole 0.193 and -0.219 e.Å-3

**Figure S2** 1H NMR spectrum for phloretin (400 MHz, CD3COCD3).

**Figure S3** 13C NMR and DEPT spectra for phloretin(100 MHz, CD3COCD3).
